# Supplementary material
Source: MDPI journal article supplement (https://www.mdpi.com/2076-3417/11/3/1234)
Supplement: s1 [file s1]

*Supplementary Material*

# **Fast and Low-Cost Synthesis of MoS<sub>2</sub> Nanostructures on Paper Substrates for Near-Infrared Photodetectors**

Neusmar J. A. Cordeiro <sup>1,\*</sup>, Cristina Gaspar <sup>2</sup>, Maria J. de Oliveira <sup>2</sup>, Daniela Nunes <sup>2</sup>, Pedro Barquinha <sup>2</sup>, Luís Pereira <sup>2</sup>, Elvira Fortunato <sup>2</sup>, Rodrigo Martins <sup>2</sup>, Edson Laureto <sup>1</sup> and Sidney A. Lourenço <sup>3,\*</sup>

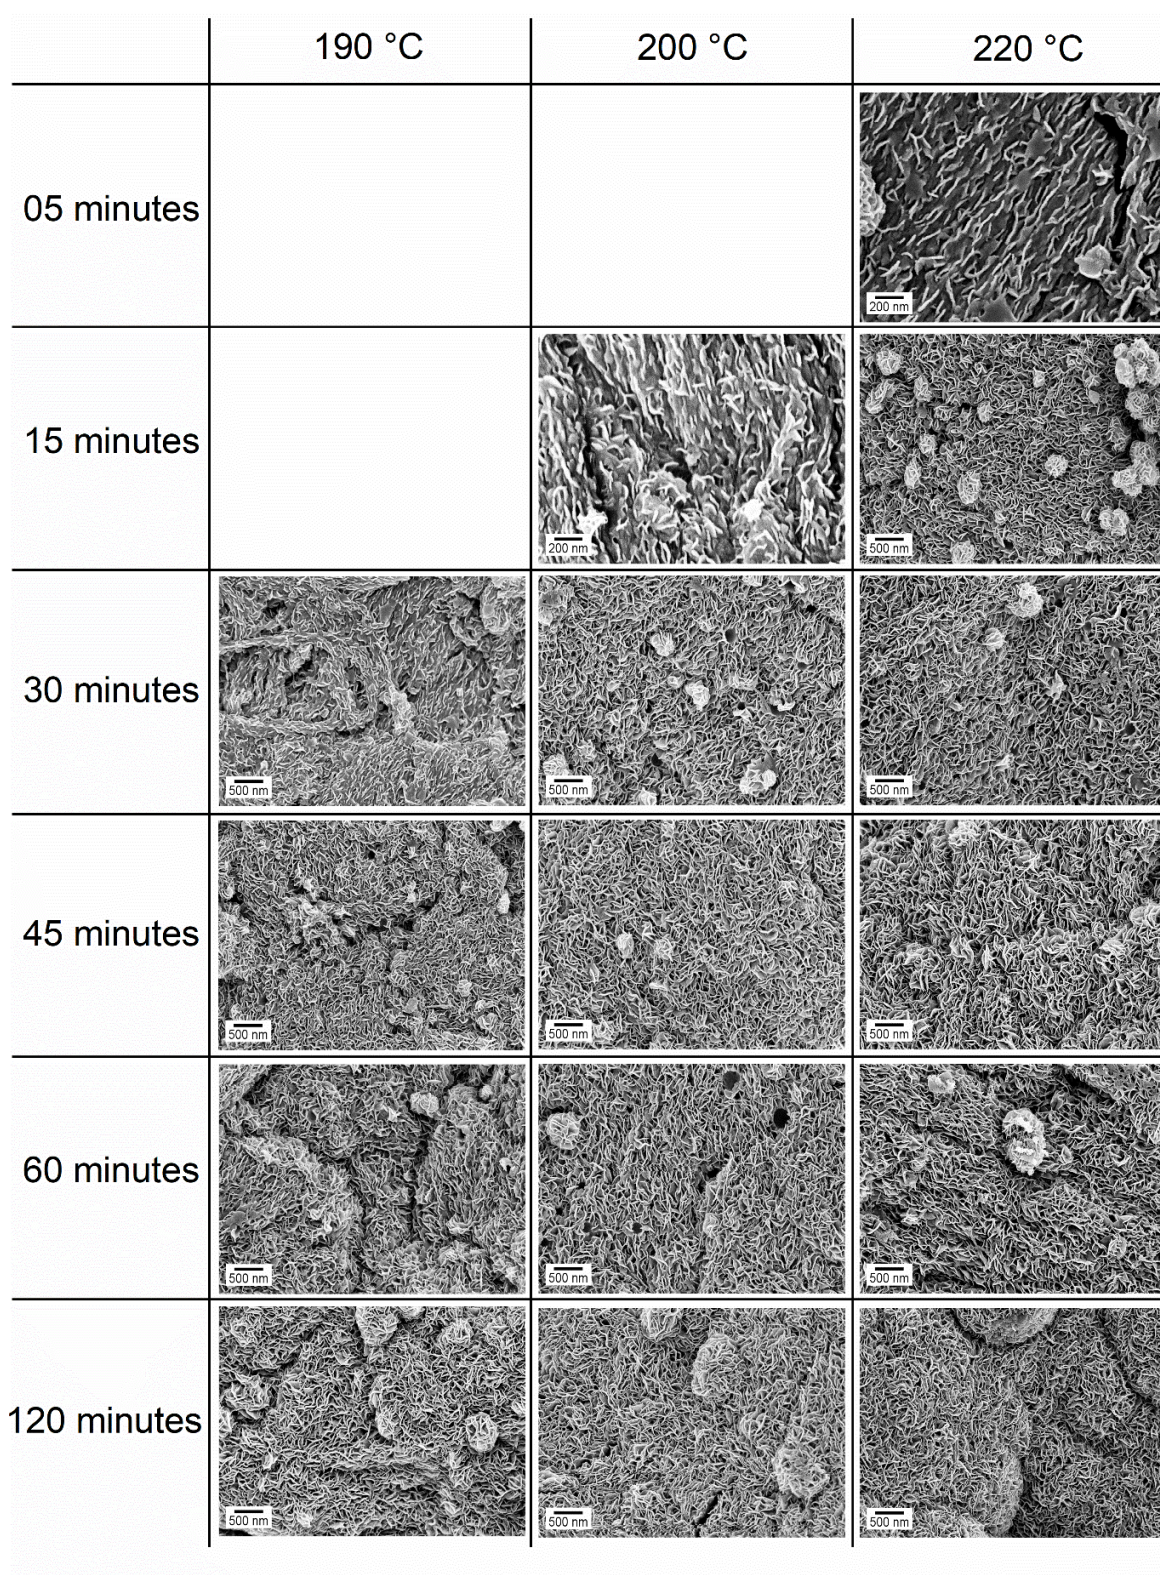

**Figure S1.** SEM images of the MoS<sub>2</sub> nanostructures grown directly on cellulose paper substrates with different temperature and time of 7 synthesis.



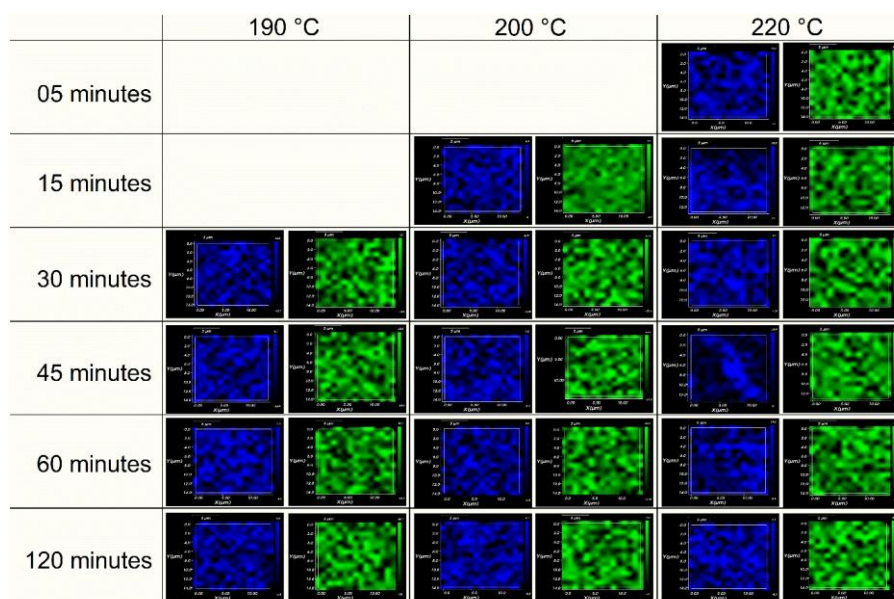

**Figure S2.** Micro-Raman mapping and detachment of phases 1T (blue) and 2H (green) in samples of MoS<sub>2</sub> nanostructures grown directly on 13 paper substrates with different temperature and time of synthesis.

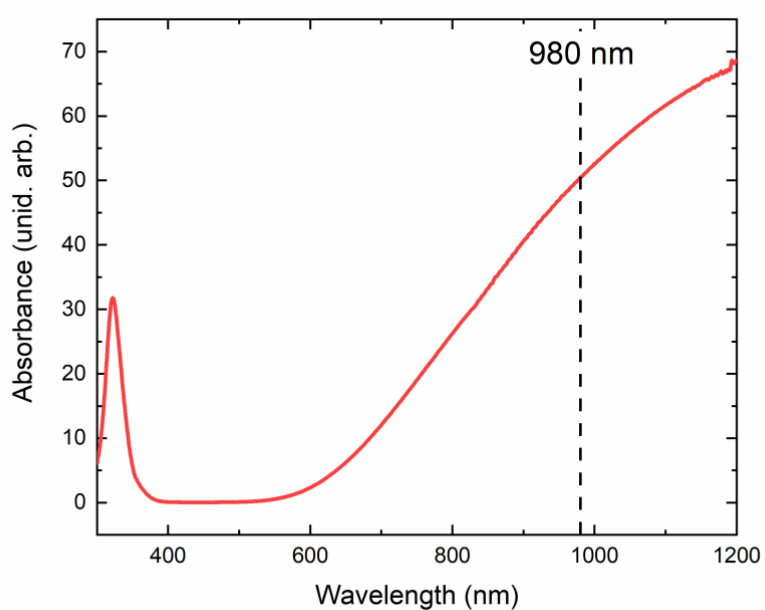

**Figure S3.** Absorbance spectrum of silver nanoparticles ink in an isopropyl alcohol solution.
